# Supplementary material for: Association of strength and plyometric exercises with change of direction performances
Source: PubMed Central journal article supplement (PMC7482936; doi:10.1371/journal.pone.0238580), 2020-09-10
Supplement: pone.0238580.s001.pdf [file pone.0238580.s001.pdf]

| Subjects       | Biometrics   |              |               | Wilks score  |              |              | Str           |
|----------------|--------------|--------------|---------------|--------------|--------------|--------------|---------------|
|                | Age          | BodyMasskg   | BodyHeight    | Squat        | UniHalfSquat | LatSquat     |               |
| 1              | 23           | 61           | 165           | 92.42        | 95.78        | 92.42        | 110           |
| 2              | 25           | 83           | 182           | 73.42        |              |              | 110           |
| 3              | 22           | 85           | 187           | 71.75        |              | 65.83        | 109           |
| 4              | 18           | 72           | 182           | 95.38        | 72.64        | 73.37        | 130           |
| 5              | 19           | 66           | 186           | 70.67        | 65.96        | 62.82        | 90            |
| 6              | 23           | 71           | 170           | 81.55        | 69.69        | 59.31        | 110           |
| 7              | 23           | 81           | 177           | 94.84        | 70.45        | 74.51        | 140           |
| 8              | 25           | 80           | 179           | 105.82       | 71           | 81.92        | 155           |
| 9              | 24           | 75.5         | 183           | 81.57        | 73.77        | 85.12        | 115           |
| 10             | 25           | 80           | 179           | 88.75        | 81.24        | 81.92        | 130           |
| 11             | 18           | 85.8         | 189           | 88.41        | 64.83        | 65.49        | 135           |
| 12             | 25           | 85           | 188           | 75.7         | 71.75        | 59.25        | 115           |
| 13             | 23           | 81           | 177           | 101.61       | 80.61        | 81.29        | 150           |
| 14             | 25           | 80           | 179           | 100.7        | 72.71        | 78.51        | 147.5         |
| 15             | 24           | 74.2         | 183           | 82.56        | 67.48        | 64.61        | 115           |
| 16             | 25           | 82           | 179           | 80.69        | 53.12        | 60.52        | 120           |
| 17             | 18           | 87           | 188           | 87.74        | 70.84        | 64.99        | 135           |
| 18             | 25           | 84           | 188           |              | 72.25        |              |               |
| 19             | 23           | 102.2        | 180           |              |              |              |               |
| 20             | 19           | 75           | 185           |              |              |              |               |
| 21             | 19           | 82.1         | 185           | 87.35        | 69.88        | 77.27        | 130           |
| 22             | 23           | 72           | 171           | 102.72       | 90.98        | 66.03        | 140           |
| 23             | 24           | 93.5         | 189           | 81.46        | 66.73        | 62.66        | 130           |
| <b>average</b> | <b>22.52</b> | <b>79.93</b> | <b>181.35</b> | <b>87.26</b> | <b>72.72</b> | <b>71.47</b> | <b>125.83</b> |
| <b>SD</b>      | <b>2.61</b>  | <b>8.76</b>  | <b>6.40</b>   | <b>10.58</b> | <b>9.39</b>  | <b>9.98</b>  | <b>16.62</b>  |

| Length (lifted in kg) |               | Strength (kg/body mass) |              |             | Plyometric exercise |              |             |
|-----------------------|---------------|-------------------------|--------------|-------------|---------------------|--------------|-------------|
| UniHalfSquat          | LatSquat      | Squat                   | UniHalfSquat | LatSquat    | DJct                | Djheight     | DJRSindex   |
| 114                   | 110           | 1.80                    | 1.87         | 1.80        | 216                 | 41.3         | 1.91        |
|                       |               | 1.33                    |              |             | 200                 | 27.6         | 1.38        |
|                       | 100           | 1.28                    |              | 1.18        | 212                 | 293          | 1.38        |
| 99                    | 100           | 1.81                    | 1.38         | 1.39        | 212                 | 39           | 1.84        |
| 84                    | 80            | 1.36                    | 1.27         | 1.21        | 219                 | 24.9         | 1.14        |
| 94                    | 80            | 1.55                    | 1.32         | 1.13        |                     |              |             |
| 104                   | 110           | 1.73                    | 1.28         | 1.36        | 187                 | 18           | 0.96        |
| 104                   | 120           | 1.94                    | 1.30         | 1.50        | 203                 | 26.7         | 1.32        |
| 104                   | 120           | 1.52                    | 1.38         | 1.59        | 208                 | 30.8         | 1.48        |
| 119                   | 120           | 1.63                    | 1.49         | 1.50        | 191                 | 26.2         | 1.37        |
| 99                    | 100           | 1.57                    | 1.15         | 1.17        | 249                 | 33.4         | 1.34        |
| 109                   | 90            | 1.35                    | 1.28         | 1.06        | 255                 | 29.4         | 1.15        |
| 119                   | 120           | 1.85                    | 1.47         | 1.48        | 272                 | 29           | 1.06        |
| 106.5                 | 115           | 1.84                    | 1.33         | 1.44        | 220                 | 37.9         | 1.72        |
| 94                    | 90            | 1.55                    | 1.27         | 1.21        | 208                 | 30.5         | 1.47        |
| 79                    | 90            | 1.46                    | 0.96         | 1.10        | 217                 | 24.3         | 1.12        |
| 109                   | 100           | 1.55                    | 1.25         | 1.15        | 198                 | 32.6         | 1.65        |
| 109                   |               |                         | 1.30         |             | 172                 | 31.1         | 1.81        |
|                       |               |                         |              |             | 228                 | 26.4         | 1.16        |
|                       |               |                         |              |             | 193                 | 28.7         | 1.49        |
| 104                   | 115           | 1.58                    | 1.27         | 1.40        |                     |              |             |
| 124                   | 90            | 1.94                    | 1.72         | 1.25        | 178                 | 30.9         | 1.74        |
| 106.5                 | 100           | 1.39                    | 1.14         | 1.07        | 225                 | 31.6         | 1.41        |
| <b>104.26</b>         | <b>102.63</b> | <b>1.60</b>             | <b>1.34</b>  | <b>1.31</b> | <b>212.52</b>       | <b>42.54</b> | <b>1.42</b> |
| <b>11.33</b>          | <b>13.58</b>  | <b>0.21</b>             | <b>0.20</b>  | <b>0.20</b> | <b>24.52</b>        | <b>57.62</b> | <b>0.27</b> |

| ise Performances |               |               | tid4m45   | tid4m180      | tid20m45      | tid20m180     | part45        |               |
|------------------|---------------|---------------|-----------|---------------|---------------|---------------|---------------|---------------|
| Squat            | Jump          | Uni Skatmax   | SkatImpCt |               |               |               |               |               |
| 20               | 180           |               |           | 167           | 245           | 400           | 487           | 144           |
| 18.2             | 201           | 430           |           | 134           | 241           | 373           | 510           | 132           |
| 14.6             |               |               |           | 160           | 241           | 373           | 417           | 123           |
| 27.6             | 231           | 453           |           | 153           | 218           | 366           | 484           | 119           |
| 17.6             | 188           | 461           |           | 186           | 242           | 420           | 512           | 127           |
|                  |               |               |           | 197           | 257           | 432           | 528           | 140           |
| 13.8             | 184           |               |           | 182           | 263           | 420           | 516           | 137           |
| 15.6             | 218           | 474           |           | 162           | 237           | 396           | 478           | 124           |
| 19.1             | 201           | 496           |           | 158           | 241           | 397           | 496           | 126           |
| 16.1             | 191           |               |           | 163           | 244           | 411           | 483           | 147           |
| 18.1             | 210           | 602           |           | 179           | 259           | 414           | 491           | 153           |
| 19.6             | 212           | 349           |           | 147           | 220           | 394           | 492           | 131           |
| 20.2             | 200           | 585           |           | 160           | 239           | 407           | 482           | 142           |
| 19.1             | 231           | 493           |           | 161           | 235           | 371           | 447           | 125           |
| 19.4             | 201           | 546           |           | 160           | 246           | 420           | 503           | 149           |
| 15.3             | 191           | 592           |           | 183           | 265           | 417           | 502           | 148           |
| 22.3             | 220           | 693           |           | 177           | 251           | 393           | 473           | 145           |
| 21.6             | 227           | 342           |           | 147           | 224           | 373           | 479           | 123           |
| 16.2             | 163           | 441           |           | 177           | 251           | 442           | 518           | 154           |
| 15.7             | 188           | 370           |           | 178           | 243           | 399           | 483           | 133           |
|                  | 194           | 387           |           | 168           | 231           | 392           | 463           | 133           |
| 14.5             | 170           | 304           |           | 184           | 257           | 416           | 498           | 142           |
| 22.3             | 220           | 511           |           | 174           | 244           | 396           | 487           | 128           |
| <b>18.42</b>     | <b>201.00</b> | <b>473.83</b> |           | <b>167.70</b> | <b>243.22</b> | <b>400.96</b> | <b>488.22</b> | <b>135.87</b> |
| <b>3.32</b>      | <b>19.25</b>  | <b>103.46</b> |           | <b>14.96</b>  | <b>12.54</b>  | <b>20.51</b>  | <b>24.13</b>  | <b>10.61</b>  |

**part180**

220  
257  
213  
238  
219  
242  
233  
212  
231  
217  
223  
233  
222  
206  
231  
222  
223  
225  
242  
213  
210  
227  
216

**225.00**

**12.15**
